# Supplementary material for: T-Cell Subtypes and Immune Signatures in Cutaneous Immune-Related Adverse Events in Melanoma Patients under Immune Checkpoint Inhibitor Therapy
Source: MDPI journal article supplement (doi:10.3390/cancers16061226), 2024-03-20
Supplement: s1 [file s1]

**Supplementary Table S1: Inclusion and exclusion criteria for patients**

| Inclusion Criteria                                                                                                                                    | Exclusion Criteria                                    |
|-------------------------------------------------------------------------------------------------------------------------------------------------------|-------------------------------------------------------|
| Age >18 years                                                                                                                                         | Prior treatment with anti-PD-1 or anti-CTLA-4 therapy |
| Capable of providing written and informed consent                                                                                                     | Switching to Braf/MEKi during the study course        |
| Advanced malignant melanoma (stage III or IV)                                                                                                         |                                                       |
| Treatment with either anti-PD-1 monotherapy or anti-PD-1/anti-CTLA-4 combination therapy according to recommendation of interdisciplinary tumor board |                                                       |
