# Supplementary material for: T-Cell Subtypes and Immune Signatures in Cutaneous Immune-Related Adverse Events in Melanoma Patients under Immune Checkpoint Inhibitor Therapy
Source: MDPI journal article supplement (doi:10.3390/cancers16061226), 2024-03-20
Supplement: s1 [file s1]

Supplementary Table S2: Immune cell proportions

|                          | average number of cells |          |
|--------------------------|-------------------------|----------|
|                          | naive                   | cutAE    |
| $\alpha\beta$ T cells    | 26223,14                | 40970,24 |
| $\gamma\delta$ T cells   | 1067,41                 | 1447,99  |
| CD4 <sup>+</sup> T cells | 9221,03                 | 20014,64 |
| CD8 <sup>+</sup> T cells | 2839,16                 | 9228,38  |
| Th17 cells               | 2536,53                 | 2601,46  |
| Th22 cells               | 177,11                  | 267,95   |
